# Supplementary material for: A Randomized, Controlled Study to Investigate How Bovine Colostrum Fortification of Human Milk Affects Bowel Habits in Preterm Infants (FortiColos Study)
Source: MDPI journal article supplement (doi:10.3390/nu14224756), 2022-11-10
Supplement: s1 [file s1]

ID number:  Date:

| 1. feed                                                                                                                                                                                                                                                                                                                                                                                                                                                                                                                                             | 2. feed                                                                                                                                                                                                                                                                                                                                                                                                                                                                                                                                             | 3. feed                                                                                                                                                                                                                                                                                                                                                                                                                                                                                                                                             | 4. feed                                                                                                                                                                                                                                                                                                                                                                                                                                                                                                                                             |
|-----------------------------------------------------------------------------------------------------------------------------------------------------------------------------------------------------------------------------------------------------------------------------------------------------------------------------------------------------------------------------------------------------------------------------------------------------------------------------------------------------------------------------------------------------|-----------------------------------------------------------------------------------------------------------------------------------------------------------------------------------------------------------------------------------------------------------------------------------------------------------------------------------------------------------------------------------------------------------------------------------------------------------------------------------------------------------------------------------------------------|-----------------------------------------------------------------------------------------------------------------------------------------------------------------------------------------------------------------------------------------------------------------------------------------------------------------------------------------------------------------------------------------------------------------------------------------------------------------------------------------------------------------------------------------------------|-----------------------------------------------------------------------------------------------------------------------------------------------------------------------------------------------------------------------------------------------------------------------------------------------------------------------------------------------------------------------------------------------------------------------------------------------------------------------------------------------------------------------------------------------------|
| Aspiration before feed?<br><input type="checkbox"/> Yes <input type="checkbox"/> No                                                                                                                                                                                                                                                                                                                                                                                                                                                                 | Aspiration before feed?<br><input type="checkbox"/> Yes <input type="checkbox"/> No                                                                                                                                                                                                                                                                                                                                                                                                                                                                 | Aspiration before feed?<br><input type="checkbox"/> Yes <input type="checkbox"/> No                                                                                                                                                                                                                                                                                                                                                                                                                                                                 | Aspiration before feed?<br><input type="checkbox"/> Yes <input type="checkbox"/> No                                                                                                                                                                                                                                                                                                                                                                                                                                                                 |
| Aspirate volume _____ ml                                                                                                                                                                                                                                                                                                                                                                                                                                                                                                                            |
| Aspirate Color (put a X)<br><div style="display: flex; justify-content: space-around;"><span style="background-color: yellow; width: 15px; height: 15px;"></span><span style="background-color: orange; width: 15px; height: 15px;"></span><span style="background-color: red; width: 15px; height: 15px;"></span><span style="background-color: green; width: 15px; height: 15px;"></span><span style="background-color: blue; width: 15px; height: 15px;"></span><span style="background-color: purple; width: 15px; height: 15px;"></span></div> | Aspirate Color (put a X)<br><div style="display: flex; justify-content: space-around;"><span style="background-color: yellow; width: 15px; height: 15px;"></span><span style="background-color: orange; width: 15px; height: 15px;"></span><span style="background-color: red; width: 15px; height: 15px;"></span><span style="background-color: green; width: 15px; height: 15px;"></span><span style="background-color: blue; width: 15px; height: 15px;"></span><span style="background-color: purple; width: 15px; height: 15px;"></span></div> | Aspirate Color (put a X)<br><div style="display: flex; justify-content: space-around;"><span style="background-color: yellow; width: 15px; height: 15px;"></span><span style="background-color: orange; width: 15px; height: 15px;"></span><span style="background-color: red; width: 15px; height: 15px;"></span><span style="background-color: green; width: 15px; height: 15px;"></span><span style="background-color: blue; width: 15px; height: 15px;"></span><span style="background-color: purple; width: 15px; height: 15px;"></span></div> | Aspirate Color (put a X)<br><div style="display: flex; justify-content: space-around;"><span style="background-color: yellow; width: 15px; height: 15px;"></span><span style="background-color: orange; width: 15px; height: 15px;"></span><span style="background-color: red; width: 15px; height: 15px;"></span><span style="background-color: green; width: 15px; height: 15px;"></span><span style="background-color: blue; width: 15px; height: 15px;"></span><span style="background-color: purple; width: 15px; height: 15px;"></span></div> |
| Was there blood in the aspirate?<br><input type="checkbox"/> Yes <input type="checkbox"/> No                                                                                                                                                                                                                                                                                                                                                                                                                                                        | Was there blood in the aspirate?<br><input type="checkbox"/> Yes <input type="checkbox"/> No                                                                                                                                                                                                                                                                                                                                                                                                                                                        | Was there blood in the aspirate?<br><input type="checkbox"/> Yes <input type="checkbox"/> No                                                                                                                                                                                                                                                                                                                                                                                                                                                        | Was there blood in the aspirate?<br><input type="checkbox"/> Yes <input type="checkbox"/> No                                                                                                                                                                                                                                                                                                                                                                                                                                                        |
| Did you <b>discard</b> the aspirate?<br><input type="checkbox"/> Yes <input type="checkbox"/> No                                                                                                                                                                                                                                                                                                                                                                                                                                                    | Did you <b>discard</b> the aspirate?<br><input type="checkbox"/> Yes <input type="checkbox"/> No                                                                                                                                                                                                                                                                                                                                                                                                                                                    | Did you <b>discard</b> the aspirate?<br><input type="checkbox"/> Yes <input type="checkbox"/> No                                                                                                                                                                                                                                                                                                                                                                                                                                                    | Did you <b>discard</b> the aspirate?<br><input type="checkbox"/> Yes <input type="checkbox"/> No                                                                                                                                                                                                                                                                                                                                                                                                                                                    |
| Expected meal in ml: _____ ml                                                                                                                                                                                                                                                                                                                                                                                                                                                                                                                       |
| Actual meal in ml: _____ ml                                                                                                                                                                                                                                                                                                                                                                                                                                                                                                                         |
| Milk given * (put a X)<br><input type="checkbox"/> MOM <input type="checkbox"/> DHM                                                                                                                                                                                                                                                                                                                                                                                                                                                                 | Milk given * (put a X)<br><input type="checkbox"/> MOM <input type="checkbox"/> DHM                                                                                                                                                                                                                                                                                                                                                                                                                                                                 | Milk given * (put a X)<br><input type="checkbox"/> MOM <input type="checkbox"/> DHM                                                                                                                                                                                                                                                                                                                                                                                                                                                                 | Milk given * (put a X)<br><input type="checkbox"/> MOM <input type="checkbox"/> DHM                                                                                                                                                                                                                                                                                                                                                                                                                                                                 |
| Fortified with (put a X)<br><input type="checkbox"/> BC <input type="checkbox"/> FM85<br>Gram: pr. 100 ml _____ g                                                                                                                                                                                                                                                                                                                                                                                                                                   | Fortified with (put a X)<br><input type="checkbox"/> BC <input type="checkbox"/> FM85<br>Gram: pr. 100 ml _____ g                                                                                                                                                                                                                                                                                                                                                                                                                                   | Fortified with (put a X)<br><input type="checkbox"/> BC <input type="checkbox"/> FM85<br>Gram: pr. 100 ml _____ g                                                                                                                                                                                                                                                                                                                                                                                                                                   | Fortified with (put a X)<br><input type="checkbox"/> BC <input type="checkbox"/> FM85<br>Gram: pr. 100 ml _____ g                                                                                                                                                                                                                                                                                                                                                                                                                                   |
| Stomach appearance (put a X)<br><input type="checkbox"/> Inconspicuous<br><input type="checkbox"/> Abdominal bloating<br><input type="checkbox"/> Visible blood vessel<br><input type="checkbox"/> Visible bowel loops<br><input type="checkbox"/> Shiny<br><input type="checkbox"/> Discoloured                                                                                                                                                                                                                                                    | Stomach appearance (put a X)<br><input type="checkbox"/> Inconspicuous<br><input type="checkbox"/> Abdominal bloating<br><input type="checkbox"/> Visible blood vessel<br><input type="checkbox"/> Visible bowel loops<br><input type="checkbox"/> Shiny<br><input type="checkbox"/> Discoloured                                                                                                                                                                                                                                                    | Stomach appearance (put a X)<br><input type="checkbox"/> Inconspicuous<br><input type="checkbox"/> Abdominal bloating<br><input type="checkbox"/> Visible blood vessel<br><input type="checkbox"/> Visible bowel loops<br><input type="checkbox"/> Shiny<br><input type="checkbox"/> Discoloured                                                                                                                                                                                                                                                    | Stomach appearance (put a X)<br><input type="checkbox"/> Inconspicuous<br><input type="checkbox"/> Abdominal bloating<br><input type="checkbox"/> Visible blood vessel<br><input type="checkbox"/> Visible bowel loops<br><input type="checkbox"/> Shiny<br><input type="checkbox"/> Discoloured                                                                                                                                                                                                                                                    |
| Stool since last meal?<br><input type="checkbox"/> yes <input type="checkbox"/> No                                                                                                                                                                                                                                                                                                                                                                                                                                                                  | Stool since last meal?<br><input type="checkbox"/> yes <input type="checkbox"/> No                                                                                                                                                                                                                                                                                                                                                                                                                                                                  | Stool since last meal?<br><input type="checkbox"/> yes <input type="checkbox"/> No                                                                                                                                                                                                                                                                                                                                                                                                                                                                  | Stool since last meal?<br><input type="checkbox"/> yes <input type="checkbox"/> No                                                                                                                                                                                                                                                                                                                                                                                                                                                                  |
| Stool amount (put a X)<br><input type="checkbox"/> 1 <input type="checkbox"/> 2 <input type="checkbox"/> 3 <input type="checkbox"/> 4                                                                                                                                                                                                                                                                                                                                                                                                               | Stool amount (put a X)<br><input type="checkbox"/> 1 <input type="checkbox"/> 2 <input type="checkbox"/> 3 <input type="checkbox"/> 4                                                                                                                                                                                                                                                                                                                                                                                                               | Stool amount (put a X)<br><input type="checkbox"/> 1 <input type="checkbox"/> 2 <input type="checkbox"/> 3 <input type="checkbox"/> 4                                                                                                                                                                                                                                                                                                                                                                                                               | Stool amount (put a X)<br><input type="checkbox"/> 1 <input type="checkbox"/> 2 <input type="checkbox"/> 3 <input type="checkbox"/> 4                                                                                                                                                                                                                                                                                                                                                                                                               |
| Blood in stool?<br><input type="checkbox"/> yes <input type="checkbox"/> No                                                                                                                                                                                                                                                                                                                                                                                                                                                                         | Blood in stool?<br><input type="checkbox"/> yes <input type="checkbox"/> No                                                                                                                                                                                                                                                                                                                                                                                                                                                                         | Blood in stool?<br><input type="checkbox"/> yes <input type="checkbox"/> No                                                                                                                                                                                                                                                                                                                                                                                                                                                                         | Blood in stool?<br><input type="checkbox"/> yes <input type="checkbox"/> No                                                                                                                                                                                                                                                                                                                                                                                                                                                                         |
| Stool consistency (put a X)<br><input type="checkbox"/> A: watery<br><input type="checkbox"/> B: Soft<br><input type="checkbox"/> C: Formed<br><input type="checkbox"/> D: Hard                                                                                                                                                                                                                                                                                                                                                                     | Stool consistency (put a X)<br><input type="checkbox"/> A: watery<br><input type="checkbox"/> B: Soft<br><input type="checkbox"/> C: Formed<br><input type="checkbox"/> D: Hard                                                                                                                                                                                                                                                                                                                                                                     | Stool consistency (put a X)<br><input type="checkbox"/> A: watery<br><input type="checkbox"/> B: Soft<br><input type="checkbox"/> C: Formed<br><input type="checkbox"/> D: Hard                                                                                                                                                                                                                                                                                                                                                                     | Stool consistency (put a X)<br><input type="checkbox"/> A: watery<br><input type="checkbox"/> B: Soft<br><input type="checkbox"/> C: Formed<br><input type="checkbox"/> D: Hard                                                                                                                                                                                                                                                                                                                                                                     |
| Stool colour (put a X)<br><div style="display: flex; justify-content: space-around;"><span style="background-color: yellow; width: 15px; height: 15px;"></span><span style="background-color: orange; width: 15px; height: 15px;"></span><span style="background-color: red; width: 15px; height: 15px;"></span><span style="background-color: green; width: 15px; height: 15px;"></span><span style="background-color: blue; width: 15px; height: 15px;"></span><span style="background-color: purple; width: 15px; height: 15px;"></span></div>   | Stool colour (put a X)<br><div style="display: flex; justify-content: space-around;"><span style="background-color: yellow; width: 15px; height: 15px;"></span><span style="background-color: orange; width: 15px; height: 15px;"></span><span style="background-color: red; width: 15px; height: 15px;"></span><span style="background-color: green; width: 15px; height: 15px;"></span><span style="background-color: blue; width: 15px; height: 15px;"></span><span style="background-color: purple; width: 15px; height: 15px;"></span></div>   | Stool colour (put a X)<br><div style="display: flex; justify-content: space-around;"><span style="background-color: yellow; width: 15px; height: 15px;"></span><span style="background-color: orange; width: 15px; height: 15px;"></span><span style="background-color: red; width: 15px; height: 15px;"></span><span style="background-color: green; width: 15px; height: 15px;"></span><span style="background-color: blue; width: 15px; height: 15px;"></span><span style="background-color: purple; width: 15px; height: 15px;"></span></div>   | Stool colour (put a X)<br><div style="display: flex; justify-content: space-around;"><span style="background-color: yellow; width: 15px; height: 15px;"></span><span style="background-color: orange; width: 15px; height: 15px;"></span><span style="background-color: red; width: 15px; height: 15px;"></span><span style="background-color: green; width: 15px; height: 15px;"></span><span style="background-color: blue; width: 15px; height: 15px;"></span><span style="background-color: purple; width: 15px; height: 15px;"></span></div>   |
| Medicine/vitamins <u>pr OS</u> ?<br><input type="checkbox"/> yes <input type="checkbox"/> No<br>if yes, which?                                                                                                                                                                                                                                                                                                                                                                                                                                      | Medicine/vitamins <u>pr OS</u> ?<br><input type="checkbox"/> yes <input type="checkbox"/> No<br>if yes, which?                                                                                                                                                                                                                                                                                                                                                                                                                                      | Medicine/vitamins <u>pr OS</u> ?<br><input type="checkbox"/> yes <input type="checkbox"/> No<br>if yes, which?                                                                                                                                                                                                                                                                                                                                                                                                                                      | Medicine/vitamins <u>pr OS</u> ?<br><input type="checkbox"/> yes <input type="checkbox"/> No<br>if yes, which?                                                                                                                                                                                                                                                                                                                                                                                                                                      |
| COMFORTneo<br>Total score _____<br>Vurdering af distress _____<br>Gas restlessness<br><input type="checkbox"/> yes <input type="checkbox"/> No                                                                                                                                                                                                                                                                                                                                                                                                      | COMFORTneo<br>Total score _____<br>Vurdering af distress _____<br>Gas restlessness<br><input type="checkbox"/> yes <input type="checkbox"/> No                                                                                                                                                                                                                                                                                                                                                                                                      | COMFORTneo<br>Total score _____<br>Vurdering af distress _____<br>Gas restlessness<br><input type="checkbox"/> yes <input type="checkbox"/> No                                                                                                                                                                                                                                                                                                                                                                                                      | COMFORTneo<br>Total score _____<br>Vurdering af distress _____<br>Gas restlessness<br><input type="checkbox"/> yes <input type="checkbox"/> No                                                                                                                                                                                                                                                                                                                                                                                                      |

\*MOM: Mother's own milk DHM: Donor human milk

Figure S1. Clips from the observation form.
